# Supplementary material
Source: PubMed Central journal article supplement (PMC9641388)
Supplement: ajcr0012-4764-f5.pdf [file ajcr0012-4764-f5.pdf]

## microRNA signature of childhood ALL

**Supplementary Table 1.** Four miRNAs associated with EFS were identified using the univariate Cox proportional hazards regression analysis

| miRNA    | Coefficient | Hazard ratio | 95% Confidence interval | p-value |
|----------|-------------|--------------|-------------------------|---------|
| miR-129  | 0.325       | 1.38         | 1.09-1.75               | 0.007   |
| miR-133a | 0.409       | 1.51         | 1.16-1.95               | 0.002   |
| miR-151  | -0.266      | 0.77         | 0.63-0.93               | 0.007   |
| miR-193a | -0.297      | 0.74         | 0.61-0.90               | 0.002   |

**Supplementary Table 2.** Comparison of the clinical characteristics between the original cohort (n=60, randomly split into the training and testing cohort) and validation cohort (n=103)

|                                  | Original cohort<br>n (%) | Validation cohort<br>n (%) | p-value |
|----------------------------------|--------------------------|----------------------------|---------|
| Onset age (years)                |                          |                            | 0.207   |
| <10                              | 47 (78.3)                | 70 (68.0)                  |         |
| ≥10                              | 13 (21.7)                | 33 (32.0)                  |         |
| Sex                              |                          |                            | 0.198   |
| Female                           | 32 (53.3)                | 44 (42.7)                  |         |
| Male                             | 28 (46.7)                | 59 (57.3)                  |         |
| Initial WBC (10 <sup>9</sup> /L) |                          |                            | 0.565   |
| <100                             | 48 (80.0)                | 77 (74.8)                  |         |
| ≥100                             | 12 (20.0)                | 26 (25.2)                  |         |
| Cell type                        |                          |                            | 0.424   |
| B cell                           | 50 (83.3)                | 79 (76.7)                  |         |
| T cell                           | 10 (16.7)                | 24 (23.3)                  |         |
| Risk group                       |                          |                            | 0.104   |
| SR+HR                            | 39 (65.0)                | 53 (51.5)                  |         |
| VHR                              | 21 (35.0)                | 50 (48.5)                  |         |
| Genetic subtypes*                |                          |                            | 0.038   |
| BCR-ABL1                         | 1 (3.5)                  | 3 (4.0)                    |         |
| ETV6-RUNX1                       | 8 (27.5)                 | 13 (15.6)                  |         |
| Hyperdiploidy                    | 8 (27.5)                 | 11 (14.9)                  |         |
| DUX4                             | 1 (3.5)                  | 0 (0)                      |         |
| ZNF384                           | 1 (3.5)                  | 2 (2.7)                    |         |
| T-ALL                            | 10 (34.5)                | 25 (33.8)                  |         |
| Other                            | 0 (0)                    | 20 (27.0)                  |         |

\*A total of 31 and 29 samples had unknown subtype in the original cohort and validation cohort, respectively. WBC, white blood cells; SR, standard risk group; HR, high-risk group; VHR, very high-risk group.

microRNA signature of childhood ALL

**Supplementary Table 3.** Adjusted hazard ratios of predictors in the prognostic model estimated using the multivariate Cox proportional hazards regression model for the training and testing cohort

| Event-Free Survival<br>Variables | Training group (n=40) |        |       |         | Testing group (n=20) |        |          |         |
|----------------------------------|-----------------------|--------|-------|---------|----------------------|--------|----------|---------|
|                                  | HR                    | 95% CI |       | p-value | HR                   | 95% CI |          | p-value |
| High risk-score group            | 10.61                 | 1.24   | 90.97 | 0.031   | 40.42                | 1.51   | 1.08E+03 | 0.028   |
| Initial WBC ≥100                 | 1.36                  | 0.14   | 12.95 | 0.788   | 13.82                | 1.44   | 1.32E+02 | 0.023   |
| T cell                           | 0.72                  | 0.10   | 5.02  | 0.736   | 0.04                 | 0.00   | 2.51     | 0.129   |
| Male                             | 0.80                  | 0.18   | 3.52  | 0.772   | 0.11                 | 0.01   | 1.99     | 0.136   |
| Age ≥10                          | 6.21                  | 1.26   | 30.54 | 0.025   | 82.43                | 1.24   | 5.47E+03 | 0.039   |
| VHR                              | 0.64                  | 0.13   | 3.13  | 0.580   | 5.13                 | 0.62   | 42.19    | 0.128   |
| Overall Survival<br>Variables    | Training group (n=40) |        |       |         | Testing group (n=20) |        |          |         |
|                                  | HR                    | 95% CI |       | p-value | HR                   | 95% CI |          | p-value |
| High risk-score group            | 1.13E+08              | 0.00   |       | 0.995   | 7.39                 | 0.37   | 1.49E+02 | 0.192   |
| Initial WBC ≥100                 | 1.84                  | 0.18   | 18.69 | 0.606   | 8.32                 | 0.43   | 1.61E+02 | 0.161   |
| T cell                           | 0.48                  | 0.05   | 4.27  | 0.507   | 2.16E+05             | 0.00   |          | 0.997   |
| Male                             | 1.01                  | 0.18   | 5.59  | 0.994   | 0.52                 | 0.03   | 8.22     | 0.644   |
| Age ≥10                          | 11.84                 | 1.77   | 79.34 | 0.011   | 0.00                 | 0.00   |          | 0.997   |
| VHR                              | 0.66                  | 0.11   | 3.90  | 0.650   | 2.39                 | 0.18   | 32.09    | 0.512   |

WBC, white blood cells.

**Supplementary Table 4.** Prediction power of the risk score model

| Cohort             | EFS               |           | OS                |           |
|--------------------|-------------------|-----------|-------------------|-----------|
|                    | Harrell's C-index | 95% CI    | Harrell's C-index | 95% CI    |
| Training (n=40)    | 0.80              | 0.65-0.94 | 0.89              | 0.82-0.97 |
| Testing (n=20)     | 0.89              | 0.79-0.99 | 0.89              | 0.75-1.00 |
| Validation (n=103) | 0.70              | 0.62-0.78 | 0.72              | 0.63-0.81 |
